# Supplementary material
Source: PubMed Central journal article supplement (PMC8410653)
Supplement: NIHMS1732452-supplement-ESI.pdf [file NIHMS1732452-supplement-ESI.pdf]

## SUPPLEMENTARY INFORMATION

### **Preparative production of an enantiomeric pair by engineered polyketide synthases**

Takeshi Miyazawa<sup>1</sup>, Brendan J. Fitzgerald<sup>1</sup>, and Adrian T. Keatinge-Clay<sup>1</sup>

Department of Molecular Biosciences,

The University of Texas at Austin, 100 E. 24<sup>th</sup> St., Austin, TX 78712

Email: [adriankc@utexas.edu](mailto:adriankc@utexas.edu)

| <b>Content</b>                                                                               | <b>Page</b> |
|----------------------------------------------------------------------------------------------|-------------|
| Methods                                                                                      | 3           |
| <b>Table S1.</b> Expression plasmid construction                                             | 7           |
| <b>Table S2.</b> Sequences of the engineered PKSs                                            | 10          |
| <b>Figure S1.</b> SDS-PAGE gel of PKSs, GDH, and MatB                                        | 15          |
| <b>Figure S2.</b> Optimization of culture conditions for <i>in vivo</i> triketide production | 16          |
| <b>Figure S3.</b> Calibration curve for triketide lactones                                   | 17          |
| <b>Figure S4.</b> <sup>1</sup> H NMR of <b>1</b>                                             | 18          |
| <b>Figure S5.</b> <sup>1</sup> H- <sup>13</sup> C-HSQC of <b>1</b>                           | 19          |
| <b>Figure S6.</b> <sup>1</sup> H NMR of <b>2</b>                                             | 20          |
| <b>Figure S7.</b> <sup>1</sup> H- <sup>13</sup> C-HSQC of <b>2</b>                           | 21          |
| <b>Figure S8.</b> Analysis of shunt products                                                 | 22          |
| <b>Figure S9.</b> Triketide lactone crystals                                                 | 23          |
| References                                                                                   | 24          |

## METHODS

### Construction of expression plasmids

Gibson assembly and SLiCE<sup>1</sup> were used to join fragments amplified from *Streptomyces venezuelae* ATCC 15439 genomic DNA with vectors (Table S1). Updated junctions were positioned between the 10<sup>th</sup> and 11<sup>th</sup> residues following the conserved GTNAH motif of KS; traditional junctions were positioned between the 1<sup>st</sup> and 2<sup>nd</sup> residues preceding the PIAIV motif of KS (Table S2).<sup>2</sup>

### Protein expression and purification

All proteins were expressed in *E. coli* K207-3 except for *Streptomyces coelicolor* MatB and *Bacillus subtilis* glucose dehydrogenase (GDH), which were expressed in *E. coli* BL21(DE3).<sup>3,4</sup> Transformed cells were shaken at 240 rpm in LB media containing either 50 mg L<sup>-1</sup> kanamycin or 50 mg L<sup>-1</sup> streptomycin to OD<sub>600</sub> = 0.6 at 37 °C. Cultures were induced with 0.5 mM isopropyl β-D-1-thiogalactopyranoside (IPTG) and incubated for 18 h at 15 °C. Cells were harvested (4000 x g for 20 min), resuspended in lysis buffer [50 mM potassium phosphate, 500 mM NaCl, 5 mM imidazole, 10% (v/v) glycerol, 1 mM TCEP, pH 7.5] and sonicated. After the cell debris was removed (30,000 x g for 30 min), the supernatant was applied to a Ni-NTA column (2 x 4 cm) and washed with 5 column volumes of lysis buffer containing 15 mM imidazole. Proteins were eluted with 2 column volumes of lysis buffer containing 250 mM imidazole. Each was concentrated (10-18 mg/mL) with an Amicon Ultra centrifugal filter (30 kD MWCO), and the buffer was exchanged for 400 mM potassium phosphate, 150 mM NaCl, 10% (v/v) glycerol, 0.5 mM TCEP, pH 7.5 (synthase polypeptides) or 15 mM HEPES, 150 mM NaCl, 10% (v/v) glycerol, pH 7.5 (MatB and GDH). Each purification was assessed by SDS-PAGE (Figure S1).

### ***In vitro* assays**

Reactions (100  $\mu$ L) were performed in 400 mM potassium phosphate, 10 mM  $\text{MgCl}_2$ , 10 mM ATP, 10 mM D-glucose, 0.5 mM  $\text{NADP}^+$ , 0.2 mM CoA, 10 mM methylmalonate or  $^{13}\text{C}$  methylmalonate, 5 mM TCEP, pH 7.5 with 10  $\mu$ M MatB, 10  $\mu$ M GDH, and 10  $\mu$ M of each synthase polypeptide. Synthase polypeptides were added after all other components had incubated for 5 min at 25  $^\circ\text{C}$ . After 1 h reactions were quenched through the addition of 70% (v/v) perchloric acid (5  $\mu$ L). Precipitate was removed (15,000  $\times$  g for 5 min), and the supernatants were extracted with ethyl acetate (2  $\times$  200  $\mu$ L). The extract was dried *in vacuo*, dissolved in 100  $\mu$ L methanol, and analyzed by high-resolution mass spectrometry (HRMS) [6230 TOF LC/MS equipped with a Microsorb-MV 300-5  $\text{C}_{18}$  column (4.6  $\times$  250 mm) with a flow rate of 1 mL  $\text{min}^{-1}$  (solvent A, water with 0.1 % formic acid; solvent B, acetonitrile with 0.1% formic acid. 5-100% B for 15 min, 100% B for 3 min), positive mode].

### ***In vivo* production in optimized conditions**

*E. coli* K207-3 cells transformed with PKS expression plasmids were shaken at 240 rpm in 50 mL LB media containing the appropriate antibiotics (50 mg  $\text{L}^{-1}$  kanamycin for 1-polypeptide synthases, 50 mg  $\text{L}^{-1}$  kanamycin and 50 mg  $\text{L}^{-1}$  streptomycin for 2-polypeptide synthases) in 250 mL flasks at 37  $^\circ\text{C}$ . From these precultures, 3 mL was used to inoculate 300 mL of production media (5 g  $\text{L}^{-1}$  yeast extract, 10 g  $\text{L}^{-1}$  casein, 15 g  $\text{L}^{-1}$  glycerol, 10 g  $\text{L}^{-1}$  NaCl, and 100 mM potassium phosphate, pH 7.6 with 50 mg  $\text{L}^{-1}$  kanamycin or 50 mg  $\text{L}^{-1}$  kanamycin and 50 mg  $\text{L}^{-1}$  streptomycin) in each 2.8 L non-baffled Fernbach flask. Cells were shaken at 240 rpm at 37  $^\circ\text{C}$  until  $\text{OD}_{600} = 0.6$ . They were then cooled to 19  $^\circ\text{C}$ , supplied with 0.1 mM IPTG and 20 mM sodium propionate, and cultured for 6 d. Time points were obtained by adding 5  $\mu$ L concentrated HCl to 500  $\mu$ L culture broth, extracting twice with the same volume of ethyl acetate, and concentrating *in vacuo*. The extract was resuspended in 500  $\mu$ L of water and 10  $\mu$ L was

analyzed by HPLC [Waters 1525 HPLC system equipped with a Microsorb-MV 300-5 C<sub>18</sub> column (4.6 × 250 mm) with a flow rate of 1 mL min<sup>-1</sup> (solvent A, water with 0.1 % formic acid; solvent B, acetonitrile with 0.1% formic acid. 5-100% B for 15 min, 100% B for 3 min)].

### **Purification of triketide lactones**

Cultures broths were adjusted to pH 3 with HCl and extracted twice with the same volume of ethyl acetate, using centrifugation (4000 x g for 5 min in polypropylene bottles) to separate emulsions. The extract was dried with MgSO<sub>4</sub>, filtered, and concentrated *in vacuo*. Propionic acid was removed by passing the extract through a silica gel plug (3 × 5 cm, EtOAc:hexanes = 30:70), and purification was performed using a silica gel column (1.5 × 15 cm, EtOAc:hexanes = 35:65).

### **Chiral chromatography**

Purified triketide lactones were dissolved in 5% acetonitrile and injected onto an Agilent 6230 TOF LC/MS connected to a Chiralcel OD-RH column (2.1 x 150 mm) equilibrated with 5% acetonitrile and 0.5% formic acid. Elution was performed through isochratic flow with the same solvent system. Triketide lactones were observed at 247 nm and by ion count.

### **Crystallization**

Purified triketide lactones were dissolved in EtOAc:hexanes = 5:95 at 40 °C and evaporated at room temperature over 3 h.

## Reagents and equipment

KAPA HiFi DNA polymerase was from KAPA Biosystems. Restriction enzymes and the NEBuilder HiFi DNA Assembly Cloning Kit used for Gibson assembly reactions were from New England Biolabs. SLiCE extract was obtained from *E. coli* DH5 $\alpha$  cells. Oligonucleotides were from Sigma-Aldrich. Luria-Bertani (LB) Miller Broth, potassium phosphate, sodium chloride, and HEPES were from Fisher Scientific. Kanamycin sulfate was from VWR. Isopropyl- $\beta$ -D-thiogalactopyranoside (IPTG) was from Carbosynth. Ni-NTA affinity resin and tris(2-carboxyethyl)phosphine hydrochloride (TCEP-HCl) were from Thermo Fisher Scientific. Magnesium chloride was from MACRON. Magnesium sulfate, succinic acid, adenosine triphosphate (ATP), and glycine were from Sigma-Aldrich. Coenzyme A (CoA) was from Oriental Yeast Co., Ltd. Sodium malonate was from VWR. Amicon Ultra-4 centrifugal filters for protein concentration were from Millipore. Ethyl acetate (EtOAc), acetonitrile, methanol, chloroform, and hexane were from Fisher Scientific. CDCl<sub>3</sub> was from Cambridge Isotope Laboratories. SiliaFlash F60 was from SiliCycle. High-resolution mass spectral (HRMS) analyses were performed on a 6230 TOF LC/MS (Agilent Technologies). <sup>1</sup>H and <sup>13</sup>C NMR spectra were collected on an Agilent 400-MR.

## Bacterial strains

*E. coli* DH5 $\alpha$  and BL21 Star (DE3)pLysS were used for plasmid construction and protein expression (MatB and GDH), respectively. *E. coli* K207-3 was used for the expression of synthase polypeptides as well as the *in vivo* production of polyketides.<sup>5</sup>

**Table S1. Expression plasmid construction.** Primers, templates, and cloning methods used to obtain fragments and assemble expression plasmids. The underlined sequence indicates homology sequences. The construction of pET28-His<sub>10</sub> has been described<sup>2</sup>.

| Plasmid                                                                                                                                                                        | Method         | Piece                                     | Template                                      | Primers                                                                                                                                       |
|--------------------------------------------------------------------------------------------------------------------------------------------------------------------------------|----------------|-------------------------------------------|-----------------------------------------------|-----------------------------------------------------------------------------------------------------------------------------------------------|
| pTM1<br>(pET28b-His <sub>10</sub> vector)<br><br>For updated 1-poly-peptide Pik127                                                                                             | 3-piece Gibson | half of pET28b+KS <sup>Q</sup> 1+AT1+ACP1 | pET28b-His <sub>10</sub> -PikAI/VemG (ref. 2) | <u>TAAAGCTCATCAGCGTGGTTCGTGAAGCGATTCA</u><br><br><u>CGGCCTCACACGCCCGGAGCAAGCTCTTCGATCTGTA</u>                                                 |
|                                                                                                                                                                                |                | KS1+AT2+KR2+ACP2+KS2                      | <i>S. venezuelae</i> ATCC 15439 genomic DNA   | <u>CCCGTACAGATCGAAGAGCTTGCTCGGGCGTGTG</u><br><br><u>GGCGGCTCGACGGCAGGGGAAGCAGCATCCGGCGCCTGCTCCA</u>                                           |
|                                                                                                                                                                                |                | AT7+ACP7+TE7 + half of pET28b             | pTM5                                          | <u>AGCAGGCGCCGGATGCTGCTTCCCCTGCCGTCGAGCCGCC</u><br><br><u>CAGGCAGACATCTGTGAATCGTTCACGACCACG</u>                                               |
| pTM2<br>(pCDF-1b vector)<br><br>For 1 <sup>st</sup> poly-peptide of updated 2-poly-peptide Pik127<br><br>For 1 <sup>st</sup> poly-peptide of traditional 2-poly-peptide Pik127 | 2-piece Gibson | KS1+AT2+KR2+ACP2                          | pTM1                                          | <u>CCCGTACAGATCGAAGAGCTTGCTCGGGCGTGTG</u><br><br><u>TCCCAGTCCGTCGGGGCCGGCTCCTCGTCACCGAGGA</u><br><u>ACTCGCTGCGGA</u>                          |
|                                                                                                                                                                                |                | pCDF-1b+KS <sup>Q</sup> 1+AT1+ACP1+CDD6   | pTM4                                          | <u>AGTTCCTCGGTGACGAGGAGCCGGCCCCGACGACTG</u><br><u>GGAGGGGC</u><br><br><u>CGGCCTCACACGCCCGGAGCAAGCTCTTCGATCTGTA</u>                            |
| pTM3<br>(pET28b-His <sub>10</sub> vector)<br><br>For 2 <sup>nd</sup> poly-peptide of updated 2-poly-peptide Pik127                                                             | 2-piece Gibson | KS2+AT7+ACP7+TE7                          | pTM1                                          | <u>GCCGGGCCGACCGTTCGGCAGGATCCGATCGCGATCGT</u><br><u>CGCGATGAGCT</u><br><br><u>TGGTGGTGGTGGTGGTTCGAGCTTGCCCCCCCCCTCGA</u><br><u>TGCCCTCGAT</u> |
|                                                                                                                                                                                |                | pET28b-His <sub>10</sub> +NDD6            | pTM5                                          | <u>GCATCGAGGGGGCGGGCAAGCTCGAGCACCACCACCA</u><br><u>CCACCAC</u><br><br><u>GCGACGATCGCGATCGGATCCTGCCGACGGTCCGCC</u><br><u>GGCGA</u>             |

| Plasmid                                                                                                                                                                                                                                            | Method         | Piece                                       | Template                                          | Primers                                                                                                                          |
|----------------------------------------------------------------------------------------------------------------------------------------------------------------------------------------------------------------------------------------------------|----------------|---------------------------------------------|---------------------------------------------------|----------------------------------------------------------------------------------------------------------------------------------|
| <p>pTM4<br/>(pCDF-1b vector)</p> <p>For 1<sup>st</sup> poly-peptide of updated Pik167</p>                                                                                                                                                          | 4-piece Gibson | KS <sup>9</sup> 1+AT1+ACP1                  | <i>S. venezuelae</i><br>ATCC 15439<br>genomic DNA | <u>ACCACCATCACGTGGGTACCTCTTCAGCCGGAATTACC</u><br>AGGACCGGT<br><br><u>CGCCCGAGCAAGCTCTTCGATCTGTGA</u>                             |
|                                                                                                                                                                                                                                                    |                | KS1                                         | <i>S. venezuelae</i><br>ATCC 15439<br>genomic DNA | <u>TCGAAGAGCTTGCTCGGGCGTGTG</u><br><br><u>CCGGGGAGTCGACAACCACCGGGGCTCTTCGA</u>                                                   |
|                                                                                                                                                                                                                                                    |                | AT6+KR6+ACP6 +CDD6                          | <i>S. venezuelae</i><br>ATCC 15439<br>genomic DNA | <u>GGTGGTTGTCGACTCCCCGGCCGTCGAGCCG</u><br><br><u>GTTTCTTTACCAGACTCGAGTCAGGTGTTACGGGGGCC</u><br>GAGAGCCAT                         |
|                                                                                                                                                                                                                                                    |                | KpnI/XhoI-pCDF-1b                           | pCDF-1b                                           |                                                                                                                                  |
| <p>pTM5<br/>(pET28b-His<sub>10</sub> vector)</p> <p>For 2<sup>nd</sup> poly-peptide of updated Pik167</p> <p>For 2<sup>nd</sup> poly-peptide of traditional 2-poly-peptide Pik127</p> <p>For 2<sup>nd</sup> poly-peptide of traditional Pik167</p> | 2-piece SLiCE  | NDD6+KS6+AT7 +ACP7+TE7                      | <i>S. venezuelae</i><br>ATCC 15439<br>genomic DNA | <u>CTTTAAGAAGGAGATATACCATGACGAGTTCCAACGAA</u><br>CAGTTGGTGGAC<br><br><u>TGGTGGTGGTGGTGGCTCGAGCTTGCCCGCCCCCTCGAT</u><br>GCCCTCGAT |
|                                                                                                                                                                                                                                                    |                | NcoI/XhoI-digested pET28b-His <sub>10</sub> | pET28b-His <sub>10</sub>                          |                                                                                                                                  |





**Table S2. Sequences of engineered PKSs.** Red, orange, blue, purple, and gray letters indicate modules 1, 2, 5, 6, and 7 of the pikromycin PKS, respectively (colored as in Figure 1). Black letters indicate residues encoded by the vectors. Bold green indicates deviations from the published sequence.

**Updated 1-polypeptide Pik127, on pTM1**  
 MGSSHHHHHHHHSSGLVPRGSHMSAGITRTGARTPVTGRGAAAWDTGEVVRVRGLPPAGPDHAEHSFSRAPTG  
 DVRAELIRGEMSTVSKSESEEFVSVSNDAGSAHGTAEPVAVVGI SCRVPGARDPREFWELLAAGGQAVTDVPPADRW  
 NAGDFYDPPRSAPGRSNSRWGGFIEDVDRFDAAFFGISPREAAEMDPQORLALALELGWEALERAGIDPSSLTGTRTG  
 VFAGAIWDDYATLKRHQGGAAITPHTVTGLHRGIIANRLSYTLGLRGPMSMVVDSGQSSSLVAVHLACESLRGGESE  
 LALAGGVSLNLVPDSIIIGASKFGGLSPDGRAYTFDARANGYVRGEGGGFVVLKRLSRAVADGDPVLAVIRGSVNN  
 GGAAQGMTPDAQAQEAVLREAHERAGTAPADVRYVELHGTGTVPVGDPIEAAALGAALGTGRPAGQPLLVGSVKTN  
 IGHLEGAAGIAGLIKAVLAVRGRALPASLNYETPNPAIPFEELNLRVNT EYLPWEPEHDGQRMVVGVSSFGMGGTN  
 AHVVLEEAPGVVEGAS**VVE**STVGGSAVGGGVVWVVSAKSAAALDAQIERLAAFASRDRTDGDVAGAVDAGAVDAG  
 AVARVLAGGRAQFEHRAVVVSGPDDLAAALAAPEGLVRGVASGVGRVAFVFPQGTQWAGMGAELLDSSAVFAAA  
 MAECEAALS PYVDWSLEAVVRQAPGAPTLERVDVVPVTFAMVSLARVWQHGGVTPQAVVGHSSQGEIAAAVVAGA  
 LSLDDAARVVTLRSKSI AAHLAGKGGMLSLALSEDAVLERLAGFDGLSVAAVNGPTATVVS GDPVQIEELARACEA  
 DGVRARVIVPDYASHSRQVEII ESELAEVLAGLSPQAPRVPPFFSTLEGAWITEPVLDDGGYWRNLRHRVGFAPAVE  
 TLATDEGFTHFVEVSAHPVLTMALPGTVTGLATLRDNGGQDRLVASLAEAWANGLAVDWSPLLP SATGHHS DLPT  
 YAFQTERHWLGEIEALAPAGEPAVQPAVLRTEAAEPAELDRDEQLRVILDKVRAQTAQVLGYATGGQIEVDRTFRE  
 AGCTSLTGVDLRNRINA AFGVRMAPSMIFDFPTPEALAEQLLLVVHGEAAANPAGAE PAPVAAAGAVDEPVAIVGM  
 ACRLPGGVASPEDLWRLVAGGGDAISEFPQDRGWDVEGLYHPDPEHPGTSYVRQGGFIENVAGFDAAFFGISPREA  
 LAMDPQORLLETSWEAVEDAGIDPTSLRGRQVGVFTGAMTHEYGPSLRDGGEGLDGYLLTGNTASVMSGRVSYTL  
 GLEGPALTVDTACSSSLVALHLAVQALRKGEVDMALAGGVAVMPTPGMFVEFSRQRGLAGDRSKAFAASADGTSW  
 SEGVGVLVERLSDARRNGHQVLAVVRGSA**VNQ**DGASNGLTAPNGPSQQRVIRRALADARLTTSDVDVVEAHGTGT  
 RLGDPIEAQALIATYQGRDDEQPLRLGSLKSNIGHTQAAAGVSGVIKMQAMRHGLLPKTLHVDEPSDQIDWSAG  
 AVELLTEAVDWPEKQDGGLRRAAVSSFGISGTNAHVVLEEAPVVVEGASVVEPSVGGSAVGGGVTPWVVS AKSAAA  
 LDAQIERLAAFASRDRTDDADAGAVDAGAVAHVLADGRAQFEHRAVALGAGADDLVQALADPDGLIRGTASGVGRV  
 AFVFPQGTQWAGMGAELLDSSAVFAAAMAECEAALS PYVDWSLEAVVRQAPGAPTLERVDVVPVTFAMVSLAR  
 VWQHGGVTPQAVVGHSSQGEIAAAV VAGALPLDDAARVVTLRSKSI AAHLAGKGGMLSLALNEDAVLERLSDFDGLS  
 VAAVNGPTATVVS GDPVQIEELAQACKADGFRARIIPVDYASHSRQVEII ESELAQVLAGLSPQAPRVPPFFSTLEG  
 TWITEPVLDDGTYWRNLRHRVGFAPAIETLAVDEGFTHFVEVSAHPVLTMTLPETVTGLGTLRREQGGQERLVTSL  
 AEAVWNLGPVAWTSLLPATASRPGLPTYAFQAERYWLENTPAALATGDDWRYRIDWKRLPAAEGSERTGLSGRWLA  
 VTPEDHSAQAAAVLTALVDAGAKVEVLTAGADDDREALAARLTALTTGDGFTGVVSLLDGLVPQVAWVQALGDAGI  
 KAPLWSVTQGA VSVGRDLTPADPDRAMLWGLGRVVALEHPERWAGLVDLPAQPDAALAHLVLTALSGATGEDQIAI  
 RTTGLHARRLARAPLHGRPRTRDWP HGTVLIITGGTGALGSHAARWMAHHGAEHL LLSRSGEQAPGATQLTAELT  
 ASGARVTIAACDVADPHAMRTLLDAI PAETPLTAVVHTAGALDDGIVDTLTAEQVRRAHRAKAVGASVLDDELTRDL  
 DLDAFVLFSSVSSTLGI PGQGNYPHNAYLDALAARRRATGRSAVSVAWGPWDGGGMAAGDGVAERLRNHGVPGM  
 PELALAALESALGRDETAITVADIDWDRFYLAYSSGRPQPLVEELPEVRIIDARDSATSGQGGSSAQGANPLAER  
 LAAAAPGERTEI LLGLVRAQAAAVLRMRS PEDVADRAFKDIGFDSLAVELRNRLTRATGLQLPATLVFDHPTPL  
 ALVSLRSEFLGDEETADARRSALPATVAGAGAGAGATDADDDPIAIVAMSCRYPGDIRSPEDLWRMLSEGGEG I  
 TPFPTDRGWDLDGLYDADPDALGRAYVREGGLHDAAEFDAEFFGVSPREALAMDPQORMLLTT SWEAFRAGEGIEP  
 ASLRGSSTGVFIGLSYQDYAARVPNAPRGVEGYLLTGSTPSVASGRIAYTFGLEGPATTVDTACSSSLTALHLAVR  
 ALRSGECTMALAGGVAMMATPHMFVEFSRQRALAPDGRSKAFSADADGFGAAEGVGLLLVERLSDARRNGHPVLAV  
 VRGTAVNQDGASNGLTAPNGPSQQRVIRQALADARLAPGDI DAVETHGTGTS LGDPIEAQGLQATY GKERPAERPL  
 AIGSVKSNIGHTQAAAGAAGI IKMVLAMRHGTLPKTLHADEPSPHVDWANSGLALVTEPIDWPAGTGPRRAAVSSF  
 GISGTNAHVVLEQAPDAASPAVEPPAGGGVWPVPSAKTSAALDAQIGQLAAYAEDRTDVPVAARALVDSRTAM  
 EHRAVAVGDSREALRDALRMPEGLVRGTVTDPGRVAFVFPQGTQWAGMGAELLDSSPEFAAAMAE CETALSPYVD  
 WSLEAVVRQAPSAPTLD RVDVVPVTFAMVSLAKVWQHGGITPEAVIGHSSQGEIAAAV VAGALTDDAARVVTLR  
 SKSIAAHLAGKGGMI SLALSEEATRQRIENLHGLSIAAVNGPTATVVS G DPTQIQELAQACEADGIRARIIPVDYA  
 SHSAHVETIENELADVLAGLSPQTPQVPPFFSTLEGTWITEPALDDGGYWRNLRHRVGFAPAVETLATDEGFTHFIE  
 VSAHPVLTMTLPDKVTGLATLRREDGGQHRLTSSLAEAWANGLALDWASLLPATGALS PAVPDLPTYAFQHRSYWI  
 SPAGPGEAPAHTASGREAVAETGLAWGPGAEDLDEEGRRSAVLAMVMRQAASVLRCDSP EEPVDRPLREIGFDSL  
 TAVDFRNRVNLRTGLQLPPTVVVF**EH**PTPVALAERISDELAERNWAVAEPSDHEQAE EEEKAAAPAGARSGADTGAGA  
 GMFRALFRQAVEDDRYGEFLDVLAESA FRPQFASPEACSERLDPVLLAGGPTDRAEGRAVLVGTGTAAANGGPHE  
 FLRLSTSFQEERDFLAVPLPGYGTGTGTGTALLPADLDTALDAQARAILRAAGDAPVLLGHSGGALLAHELAFRL  
 ERAHGAPPAGIVLVDPYPGGHQEPIEVWSRQLGEGLFAGELEPMSDARLLAMGRYARFLAGPRPGRSSAPVLLVRA  
 SEPLGDWQEERGDWRAHWDLPHTVADVPGDHFTMMRDHAPAVAEAVLSWLD AIEGIEGAGKLEHHHHHHHHHH

**1<sup>st</sup> polypeptide of updated 2-polypeptide Pik127 and 1<sup>st</sup> polypeptide of traditional 2-polypeptide Pik127, on pTM2**

MGSSHHHHHHHHSSGLVPRGSHMSSAGITRTGARTPVTGRGAAAWDTGEVVRRLPPAGPDHAEHSFSRAPTG  
DVRAELIRGEMSTVSKSESEEFVSVSNDAGSAHGTAEPVAVVGI SCRVPGARDPREFWELLAAGGQAVTDV PADRW  
NAGDFYDPPRSAPGRSNSRWGGFIEDVDRFDAFFGISPREAAEMDPQORLALLEGWEALERAGIDPSSLTGTRTG  
VFAGAIWDDYATLKHRQGGAAITPHTVTGLHRGIIANRLSYTLGLRGPMSMVVDSGQSSSLVAVHLACESLRGSE  
LALAGGVSLNLVPDSIIIGASKFGGLSPDGRAYTFDARANGYVRGEGGGFVVLKRLSRAVADGDPVLAVIRGSAVNN  
GGAAQGMTPDAQAQEAVLREAHERAGTAPADVRYVELHGTGTVPVGDPIEAAALGAALGTGRPAGQPLLVGSVKTN  
IGHLEGAAGIAGLIKAVLAVRGRALPASLNYETPNPAIPFEELNLRVNT EYLPWEPEHDGQRMVVGVS SFGMGGTN  
AHVVLEEAPGVVEGASVVESTVGGSAVGGGVVWVVS AKSAAALDAQIERLAAFASRDRTDGDVAGAVDAGAVDAG  
AVARVLAGGRAQFEHRAVVVSGPDDLAAALAAPEGLVRGVASGVGRVAFVFPQGGTQWAGMGAELLDSSAVFAAA  
MAECEAALS PYVDWSLEAVVRQAPGAPT LERVDVVQPVTFAMVSLARVWQHGGVTPQAVVGHSSQGEIAAAV VAGA  
LSLDDAARVVTLRSKSAIAHLAGKGGMLSLALSEDAVLERLAGFDGLSVAAVNGPTATVVS GDPVQIEELARACEA  
DGVRRVPIVDYASHSRQVEIESELAEVLAGLSPQAPRVFFFSTLEGAWITEPVLDDGGYWRNLRHRVGFAPAVE  
TLATDEGFTHFVEVSAHPVLTMALPGTVTGLATLRDNGGQDRLVASLAEAWANGLAVDWSPLLP SATGHSSDLPT  
YAFQTERHWLGEIEALAPAGEPAVQPAVLRTEAAEPAELDRDEQLRVILDKVRAQTAQVLYGATGGQIEVDRTFRE  
AGCTSLTGVDLRNRINAAFGVRMAPSMIFDFPTPEALAEQLLLHVHGEAAANPAGAE PAPVAAAGAVDEPVAIVGM  
ACRLPGGVASPEDLWRLVAGGGDAISEFPQDRGWDVEGLYHPDPEHPGTSYVRQGGFIENVAGFDAFFGISPREA  
LAMDPQORLLET SWEAVEDAGIDP TSLRGRQVGVFTGAMTHEYGPSLRDGGEGLDGYLLTGNTASVMSGRVSYTL  
GLEGPALTVDTACSSSLVALHLAVQALRKGEVDMALAGGVAVMPTPGMFVEFSRQRGLAGDGRSKAFAASADGTSW  
SEGVGVLVERLS DARRNGHVLA VVRGSAVNQDGASNGLTAPNGPSQQRVIRRALADARLTTSDVDVVEAHGTGT  
RLGDP IEAQAL IATYQGRDDEQPLRLGSLKSNIGHTQAAAGVSGVIKMQAMRHGLLPKTLHVDEPSDQIDWSAG  
AVELLTEAVDWPEKQDGGRLRAAVSSFGISGTNAHVLEEAPVVVEGASVVEPSVGGSAVGGGVTPWVVS AKSAAA  
LDAQIERLAAFASRDRTDDADAGAVDAGAVAHVLADGRAQFEHRAVALGAGADDLVQALADPDGLIRGTASGVGRV  
AFVFPQGGTQWAGMGAELLDSSAVFAAAMAECEAALS PYVDWSLEAVVRQAPGAPT LERVDVVQPVTFAMVSLAR  
VWQHGGVTPQAVVGHSSQGEIAAAV VAGALPLDDAARVVTLRSKSAIAHLAGKGGMLSLALNEDAVLERLSDFDGLS  
VAAVNGPTATVVS GDPVQIEELAQACKADGFRARIIPVDYASHSRQVEIESELAQVLAGLSPQAPRVFFFSTLEG  
TWITEPVLDDGTYWRNLRHRVGFAPAIETLAVDEGFTHFVEVSAHPVLTMTLPETVTGLGTLRREQGGQERLVTSL  
AEAWVNLGPVAWTSLLPATASRPGLPTYAFQAERYWLENTPAALATGDDWRYRIDWKRLPAAEGSERTGLSGRWLA  
VTPEDHSAQAAAVLTALVDAGAKVEVLTAGADDDREALAARLTALTGDTGFTGVVSLLDGLVPQVAWVQALGDAGI  
KAPLWSVTQGA VSVGRDLTPADPDRAMLWGLGRVVALEHPERWAGLVDLPAQPDAALAHVLTALSGATGEDQIAI  
RTTGLHARRLARAPLHGRRPTRDWP HGTVLTITGGTGALGSHAARWMAHGHAEHLLLVSRSGEQAPGATQLTAELT  
ASGARVTIAACDVADPHAMRTLLDAI PAETPLTAVVHTAGALDDGIVDTLTAEQVRRRAHRAKAVGASVLDDELTRDL  
DLDAFVLEFSSVSSTLGI PGQGNYPHNAYLDALAAARRATGRSAVSVAWGPWDGGGMAAGDVAERLRNHGVPGMG  
PELALAALESALGRDETAITVADIDWDRFYLA YSSGRPQPLVEELPEVRRIIDARDSATSGQGGSSAQGANPLAER  
LAAAAPGERTEILLGLVRAQAAAVLRMRS PEDVAADRAFKDIGFDSLAVELRNRLTRATGLQLPATLVFDHPTPL  
ALVSLLRSEFLGDEEPAPT DWEGRRVRRALAEPLDRLRDAGVLDTVLRLTGIEPEPGSGGSDGGAADPGAEP EASI  
DDLDAEALIRMALGPRNT

**2<sup>nd</sup> polypeptide of updated 2-polypeptide Pik127, on pTM3**

MTSSNEQLVDALRASLKENEE LRKESRRRADRRQDPIAIVAMSCRYPGDIRSPEDLWRMLSEGGEITPFPPTDRGW  
DL DGLYDADPDALGRAYVREGGFLHDAAEFDAEFFGVSPREALAMDPQQRMLLTT SWEAFERAGIEPASLRGSSTG  
VFIGLSYQDYAARVPNAPRGVEGYLLTGSTPSVASGRIAYTFGLEGPATTVD TACSSSLTALHLAVRALRS GECTM  
ALAGGVAMMATPHMFVEFSRQRALAPDGRSKAFSADADGFGAAEGVGLLLVERLS DARRNGHPVLA VVRGTAVNQD  
GASNGLTAPNGPSQQRVIRQALADARLAPGDI DAVETHGTGTS LGDPIEAQGLQATY GKERPAERPLAIGSVKSN I  
GHTQAAAGAAGI IKMVLAMRHGTLPKTLHADEPSPHVDWANSGLALVTEPIDWPAGTGPRRAAVSSFGISGTNAHV  
VLEQAPDAASPAVEPPAGGGVVPWPVSAKTSAAALDAQIGQLAAYAEDRTDVP PAVAARALVDSRTAMEHRAVAVGD  
SREALRDALRMPEGLVRGTVTDPGRVAFVFPQGGTQWAGMGAELLDSSPEFAAAMAE CETALS PYVDWSLEAVVRQ  
APSAPTLDRVDVVQPVTFAMVSLAKVWQHGGITPEAVIGHSSQGEIAAAV VAGALTLD DAARVVTLRSKSAIAHLA  
GKGGMISLALSEEATRQRIENLHGLSIAAVNGPTATVVS GDTQIQELAQACEADGIRARIIPVDYASHSAHVETI  
ENELADVLAGLSPQTPQVPFFFSTLEGTWITEPALDDGGYWRNLRHRVGFAPAVETLATDEGFTHFIEVSAHPVLTM  
TLPDKVTGLATLRREDGGQHRLTTS LAEAWANGLALD WASLLPATGALSPAVPDLPTYAFQHRSYWIS PGPGEAP  
AHTASGREAVAETGLAWGPGAEDLDEEGRRSAVLAMVMRQAASVLRCDSP EEPVDRPLREIGFDSLTA VDFRNRV  
NRLTGLQLPPTVVFEHPTPVALAERISDELAERNWAVEPSDHEQAE EEEKAAAPAGARS GADTGAGAGMFRALFRQ  
AVEDDRYGEFLDVLAESA FRPQFASPEACSERLDPVLLAGGPTDRAE GRAVLVGCTGTAANGGPHEFLRLSTSFQ  
EERDFLAVPLPGYGTGTGTGTALLPADLDTALDAQARAILRAAGDAPVLLGHSGGALLAHELAFRLERAHGAPPA

GIVLVDPYPPGHQEPTEVWSRQLGEGLFAGELEPMSDARLLAMGRYARFLAGPRPGRSSAPVLLVRASEPLGDWQE  
ERGDWRAHWDLPHTVADVPGDHFTMMRDHAPAVAEAVLSWLDAIEGIEGAGKLEHHHHHHHHHH

**1<sup>st</sup> polypeptide of updated 2-polypeptide Pik167, on pTM4**

MAHHHHHHVGTSSAGITRTGARTPVTGRGAAAWDTGEVVRVRRGLPPAGPDHAEHSFSRAPTDGVDRAELIRGEMSTV  
SKSESEEFVSVSNDAGSAHGTAEPVAVVVGISCRVPGARDPREFWELLAAGGQAVTDVPPADRWNAGDFYDPDRSAPG  
RSNSRWGGFIEDVDRFDAAFFGISPREAAEMDPQORLALLEGWEALERAGIDPSSLTGTTRTGTFAGAIWDDYATLK  
HRQGGAAITPHTVTGLHRGIIANRLSYTLGLRGPSMVVDSGQSSSLVAVHLACESLRRGESESELALAGGVSLNLVDP  
SIIIGASKFGGLSPDGRAYTFDARANGYVRGEGGGFVVLKRLSRAVADGDPVLAVIRGSVAVNNGGAAQGMTPDAQA  
QEAVLREAHERAGTAPADVRYVELHGTGTVPVGDPIEAAALGAALGTGRPAGQPLLVGSVKTNIGHLEGAAGIAGLI  
KAVLAVRGRALPASLNYETPNPAIPFEELNLRVNTYEYLPWEPEHDGQRMVVGVS SFGMGGTNAHVLEEAPGVVEG  
ASVVESTVGGSAVGGGVVWVVSAKSAAALDAQIERLAAFASRDRTDGDVAGAVDAGAVDAGAVARVLAGGRAQFE  
HRAVVVSGPDDLAALAAPEGLVRGVASGVGRVAFVFPQGQTQWAGMGAELLDSSAVFAAAMAEC EAALS PYVDW  
SLEAVVRQAPGAPTLERVDVVQVPTFAVMVSLARVWQHGGVTPQAVVGHSSQGEIAAAVYVAGALSLDDAARVVTLRS  
KSIAAHLAGKGGMLSLALSEDAVLERLAGFDGLSVAAVNGPTATVVS GDPVQIEELARACEADGVRARVIVPDYAS  
HSRQVEIESELAEVLAGLSPQAPRVFFSTLEGAVITPVLDDGGYWRNLRHRVGFAPAVETLATDEGFTHFVEV  
SAHPVLTMLPGTVTGLATLRRDNGGQDRLVASLAEAWANGLAVDWSPLLP SATGHHS DLPTYAFQTERHWLGEIE  
ALAPAGEPAVQPAVLRTEAAEPAELDRDEQLRVILDKVRAQTAQVLYATGGQIEVDRTFREAGCTSLTGVDLNRN  
INAAFVGRMAPSMIFDFPTPEALAEQLLLLVHGEAAANPAGAE PAPVAAAGAVDEPVAIVGMACRLPGGVASPEDL  
WRLVAGGGDAISEFPQDRGWDVEGLYHPDPEHPGTSYVRQGGF IENVAGFDAAFFGISPREALAMPQQRLLLET  
WEAVEDAGIDPTSLRGRQVGVFTGAMTHEYGPSLRDGGEGLDGYLLTGNTASVMSGRVSYTLGLEGPALTVDTACS  
SSLVALHLAVQALRKGEVDMALAGGVAVMPTPGMFVEFSRQRGLAGDGRSKAFAASADGTSWSEGVGVLLVERLSD  
ARRNGHQVLAVVRGSAVNQDGASNGLTAPNGPSQQRVIRRALADARLTTSDVDVVEAHGTGTRLGDP IEAQAL IAT  
YQGRDDEQPLRLGSLKSNIGHTQAAAGVSGVIKMQAMRHGLL P KTLHVDEPSDQIDWSAGAVELLTEAVDWPEK  
QDGGLRRAAVSSFGISGTNAHVLEEAPVVVDS PAVEPPAGGGVVPVPSAKT PAALDAQIGQLAAYADGRTDVDP  
AVAARALVDSRTAMEHRAVAVGDSREALRDALRMPEGLVRGTSSDVGRVAFVFPQGQTQWAGMGAELLDSSPEFAA  
SMAECETALSRYVDWSLEAVVRQEPGAPTLDRVDVVQVPTFAVMVSLAKVWQHGGITPQAVVGHSSQGEIAAAVYVAG  
ALTLDDAARVVTLRSKSIAAHLAGKGGMISLALDEAAVLKRLSDFDGLSVAAVNGPTATVVS G DPTQIEELARTCE  
ADGVRARIIPVDYASHSRQVEIEKELAEVLAGLAPQAPHVFFSTLEGTWITEPVLDDGTYWRNLRHRVGFAPAV  
ETLAVDGFTHFIEVSAHPVLTMTLPETVTGLGLTLRREQGGQERLVTSLAEAWANGLTIDWAPILPTATGHHPELPT  
YAFQTERFWLQSSAPTSAAADDWRYRVEWKPLTASGQADLSGRWIVAVGSEPEAE LLGALKAAGAEVDVLEAGADDD  
REALAARLTALTTGDGFTGVVSLDDLVPPQVAWVQALGDAGIKAPLWSVTQGAVSVGRLDTPADPDRAMLWGLGRV  
VALEHPERWAGLVDLPAQPDAALAHLVLTALSGATGEDQIAIRTTGLHARRLARAPLHGRPRTRDWP HGTVLTITG  
GTGALGSHAARWMAHGAEHLLLVSRSGEQAPGATQLTAELTAGGARVTIAACDVADPHAMRTLLDAI PAETPLTA  
VVHTAGAPGGDPLDVTGPEDIARILGAKTSGAEVLLDGLRGTPLDAFVLYSSNAGVWVSGSQGVYAAANAHLDALA  
ARRRARGETATSVAWGLWAGDGMGRGADDAVYQRRGIRPMS PDRALDELAKALSHDET FVAVADVDWERFAPAFTV  
SRPSLLLDGVPPEARQALAAPVGPAPGDAAVPTGQSSALAAITALPEPERRPALLTLVRTHAAAVLGHSSPDRVA  
PGRAFTELGFDSLTAVQLRNQLSTVVGNRLPATTVFDHPTPAALAAHLHEAYLAPAEPAPT DWEGRVRRALAEPL  
DRLRDAGVLDTVLRLTGIEPEPGSGGSDGGAADPGAEP EASIDDLDAEALIRMALGPRNT

**2<sup>nd</sup> polypeptide of updated Pik167, 2<sup>nd</sup> polypeptide of updated 2-polypeptide Pik127, and 2<sup>nd</sup> polypeptide of traditional 2-polypeptide Pik127, on pTM5**

MTSSNEQLVDALRASLKENEELRKESSRRADRRQEPMAIVGMSCRFAAGGIRSPEDLWDVAAGKDLVSEVPEERGW  
DIDSLYDPVPGRKGTTYVRNAAFLDDAAGFDAAFFGISPREALAMPQQRQLLEASWEVFERAGIDPASVRGTDVG  
VYVCGCYQDYAPDIRVAPEGTGGYVVTGNSSAVASGRIAYS LGLEGPAVTVDTACSSSLVALHLALKGLRNGDCST  
ALVGGVAVLATPGAFIEFSSQQAMAADGRTKGFASAADGLAWGEGVAVLLLERLSDARRKGHVRLAVVRGSAINQD  
GASNGLTAPHGPSQQLIRQALADARLTTSDVDVVEGHGTGTRLGDP IEAQALLATYQGRAPGQPLRLGTLKSN I  
GHTQAASGVAGVIKMQALRHGVLPKTLHVDEPTDQVDWSAGSVELLTEAVDWPERPGR LR RAGVSAFGVGGTNAH  
VVLEEAPAVEESPAVEPPAGGGVVPVPSAKTSAALDAQIGQLAAYAEDRTDVPVAARALVDSRTAMEHRAVAV  
GDSREALRDALRMPEGLVRGTVTDVGRVAFVFPQGQTQWAGMGAELLDSSPEFAAAMAECETALS PYVDWSLEAVV  
RQAPSAPTLDRVDVVQVPTFAVMVSLAKVWQHGGITPEAVIGHSSQGEIAAAVYVAGALTLDDAARVVTLRSKSIAAH  
LAGKGGMISLALSEEATRQRIENLHGLSIAAVNGPTATVVS G DPTQIQELAQACEADGIRARIIPVDYASHSAHVE  
TIENELADVLAGLSPQTPQVPFFSTLEGTWITEPALDGGYWRNLRHRVGFAPAVETLATDEGFTHFIEVSAHPVL  
TMTLPDKVTGLATLRRDGGQHRLTTS LAEAWANGLALD WASLLPATGALS PAVPDLPTYAFQHRYSWIS PAGPGE  
APAHTASGREAVAETGLAWGPGAEDLDEEGRRSAVLAMVMRQAASVLRCDSP EEV PVD RPLREIGFDSLTAVD FRN  
RVNRLTGLQLPPTVVFEHPTPVALAERISDELAERNWAVEPSDHEQAE E E KAAAPAGARS GADT GAGAGMFRALF  
RQAVEDDRYGEFLDVLAESA FRPQFASPEACSERLDPVLLAGGPTDRAE GRAVLVGCTGTAANGGPHEFLRLSTS  
FQEERDFLAVPLPGYGTGTGTGTALLPADLDTALDAQARAILRAAGDAPVLLGHSGGALLAHELAFRLERAHGAP

PAGIVLVDPPYPPGHQEP I EVWSRQLGEGLFAGELEPMSDARLLAMGRYARFLAGPRPGRSSAPVLLVRASEPLGDW  
QEERGDWRAHWDLPH TVADVPGDHFTMMRDHAPAVAEAVLSWLD AIEGIEGAGKLEHHHHHHHHHH

**Traditional 1-polypeptide Pik127, on pTM6**

MGSSHHHHHHHHHHSSGLVPRGSHMSSAGITRTGARTPVTGRGAAAWDTGEVVRRLPPAGPDHAEHSFSRAPTG  
DVRAELIRGEMSTVSKSESEEFVSVSNDAGSAHGTAEPVAVVGI SCRVP GARDPREFWELLAAGGQAVTDVPADRW  
NAGDFYDPPRSAPGRSNSRWGGFIEDVDRFDAAFFGISPREAAEMDPQORLAL ELGW EALERAGIDPSSLTGTRTG  
VFAGAIWDDYATLKHRRQGGAAITPHTVTGLHRGIIANRLSYTLGLRGPSMVVDSGQSSSLVAVHLACESLRGGESE  
LALAGGVSLNLVPDSII GASKFGGLSPDGRAYTFDARANGYVRGEGGGFVVLKRLSRAVADGDPVLAVIRGSAVNN  
GGAAQGMTPDAQAQEAVLREAHERAGTAPADVRYVELHGTGT PVGDP I EAAALGAALGTGRPAGQPLL VGSVKTN  
IGHLEGAAGIAGLIKAVLAVRGRALPASLNYETPNPAI PFEELNLRVNT EYLPWEPEHDGQRMVVGVS SFGMGGTN  
AHVVLEEAPGVVEGASVVESTVGGSAVGGGVV P WVVS AKSAAALDAQIERLA AFASRDRTDGDV DAGAVDAGAVDAG  
AVARVLAGGRAQFEHRAVVVSGPDDLAAALAAPEGLVRGVASGVGRVAFVFPQGQTQWAGMGAELLDSSAVFAAA  
MAECEAALSPYVDWSLEAVVRQAPGAPTLERVDVVQPVTFAVMVSLARVWQHGGVTPQAVVGHSSQGEIAAAV VAGA  
LSLDDAARVVTLRSKSI A AHLAGKGGMLS LALSEDAVLERLAGFDGLSVA AVNGPTATVVS G D P V Q I E E L A R A C E A  
DGVRARV I PVDYASHSRQVEI I ESELAEVLAGLSPQAPRV PFFSTLEGAWITEPVL DGGYWRNLRHRVGFAPAVE  
TLATDEGFTHFVEVSAHPVLTMLPGTVTGLATLRDNGGQDRLVASLAEAWANGLAVDWSPLLP SATGHHS DLPT  
YAFQTERHWLGEIEALAPAGEPAVQPAVLRTEAAEPAELDRDEQLRVILDKVRAQTAQVLYGATGGQIEVDRTFRE  
AGCTSLTGVDLRNRINA AF GVRMAPSMIFDFPTPEALAEQ LLLLVHGEAAANPAGAE PAPVAAAGAVDEPVAIVGM  
ACRLPGGVASPEDLWRLVAGGGDAI SEFPQDRGWDVEGLYHPDPEHPGTSYVRQGGF I ENVAGFDAAFFGISPREA  
LAMDPQORL LLET SWEAVEDAGIDPTS LRGRQVGVFTGAMTHEYGPSLRDGGEGLDGYLLTGNTASVMSGRVSYTL  
GLEGPALTVDTACSSSLVALHLAVQALRKGEVDMALAGGVAVMPTPGMFVEFSRQRGLAGDGRSKAFAASADGTSW  
SEGVGVLLVERLSDARRNGHQVLAVVRGSAVNQDGASNGLTAPNGPSQQRVIRRALADARLTTSDVDVVEAHGTGT  
RLGDP IEAQAL IATYQGGRDDEQPLRLGSLKSNIGHTQAAGVSGVIK MVQAMRHGLLPKTLHVDEPSDQIDWSAG  
AVELLTEAVDWPEKQDGG LRRAAVSSFGISGTNAHVVLEEAPVVEGASVVEPSVGGSAVGGGVTPWVVS AKSAAA  
LDAQIERLA AFASRDRTDDADAGAVDAGAVAHVLADGRAQFEHRAVALGAGADDLVQALADPDGLIRGTASGVGRV  
AFVFPQGQTQWAGMGAELLDSSAVFAA MAECEAALSPYVDWSLEAVVRQAPGAPTLERVDVVQPVTFAVMVSLAR  
VWQHGGVTPQAVVGHSSQGEIAAAV VAGALPLDDAARVVTLRSKSI A AHLAGKGGMLS LALNEDAVLERLSDFDGLS  
VA AVNGPTATVVS G D P V Q I E E L A Q A C K A D G F R A R I I P V D Y A S H S R Q V E I I E S E L A Q V L A G L S P Q A P R V P F F S T L E G  
TWITEPVL DGT Y W Y R N L R H R V G F A P A I E T L A V D E G F T H F V E V S A H P V L T M T L P E T V T G L G T L R R E Q G G Q E R L V T S L  
AEAWVNGLPVAWTSLLPATASRPGLPTYAFQAERYWLENTPAALATGDDWRYRIDWKRLPAAEGSERTGLSGRWLA  
VTPEDHSAQAAAVLTALVDAGAKVEVLTAGADDDREALAARLTALTTGDGFTGVVSLLDGLVPQVAWVQALGDAGI  
KAPLWSVTQGA VSVGR LDT PADPDRAMLWGLGRVVALEHPERWAGLVDLPAQPDAALAHLV TALS GATGEDQIAI  
RTTGLHARRLARAPLHGRRPTRDWQPHGTVLTITGGTGALGSHAARMAHGHAEHLLLVSRSGEQAPGATQDLTAELT  
ASGARVTIAACDVADPHAMRTLLDAI PAETPLTAVVHTAGALDDGIVDTLTAEQVRRRAHRAKAVGASVLDLSTRDL  
DLDAFVLFSSVSTLGI PGQGNYPHNAYLDALAARRRATGRSAVSVAWGPWDGGGMAAGDGAERLRNHGVP GMD  
PELALAALESALGRDETAITVADIDWDRFYLAYSSGRPQPLVEELPEVRRIIDARDSATSGQGGSSAQGANPLAER  
LAAAAPGERTEILLGLVRAQAAAVLRMRS PEDVAADRAFKDIGFDSLAVELRNRLTRATGLQLPATLVFDHPTPL  
ALVSLLRSEFLGDEETADARRSAALPATV GAGAGAGAGT DADDEPMAIVGMSCRFAGGIRSPEDLWDAVAAGKDLV  
SEVPEERGWDIDSLYDPVPGKGTTYVRNA AFLDDAAGFDAAFFGISPREALAMDPQORQLLEASWEVFERAGIDP  
ASVRGTDVGVYVGCYQDYAPDIRVAPEGTGGYVVTGNSSAVASGRIAYS LGLEGP AVTVDTACSSSLVALHLALK  
GLRNGDCSTALVGGVAVLATPGAFIEFSSQQA MAADGRTKGFASAADGLAWGEGVAVLLERLSDARRKGRVAVLAV  
VRGSAINQDGASNGLTAPHGPSQQHLIRQALADARLTSSDVDVVEGHGTGTRLGDP IEAQALLATYQGGRAPGQPL  
RLGTLKSNIGHTQAASGVAGVIK MVQALRHGVLPKTLHVDEPTDQVDWSAGSVELLTEAVDWPERPGRLRRAGVSA  
FGVGGTNAHVVLEEAPAVEESPAVEPPAGGGVVPVPSAKTSAALDAQIGQLAAYAEDRTDVPDPAVAARALVDSRT  
AMEHRAVAVGDSREALRDALRMPEGLVRGTVTD PGRVAFVFPQGQTQWAGMGAELLDSSPEFAA MAECETALSPY  
VDWSLEAVVRQAPSAPTLDRVDVVQPVTFAVMVSLAKVWQHGGITPEAVIGHSSQGEIAAAV VAGALTDDAARVV T  
LRSKSI A AHLAGKGGMISLALSEEATRQRIENLHGLSIA AVNGPTATVVS G D P T Q I Q E L A Q A C E A D G I R A R I I P V D  
YASHSAHVETIENELADVLAGLSPQTPQV PFFSTLEG TWITEPALDGGYWRNLRHRVGFAPAVETLATDEGFTHF  
IEVSAHPVLTMTLPDKVTGLATLRREDGGQHRLTTS LAEAWANGLALDWASLLPATGALSPAVPDLPTYAFQHRSY  
WISPAGPGEAPAHTASGREAVAETGLAWGPGAEDLDEEGRRSAVLAMVMRQAASVLRCDSP E E V P V D R P L R E I G F D  
SLTAVDFRNRVNRLTGLQLPPTVVF E HPTPVALAERI SDELAERNWAVAEPSDHEQAE E E E K A A A P A G A R S G A D T G A  
GAGMFRALFRQAVEDDRYGEFLDVLAESA FRPQFASPEACSERLDPVLLAGGPTDRAEGRVAVLGCTGTAANGGP  
HEFLRLSTSFQEERDFLAVPLPGYGTGTGTALLPADLDTALDAQARAILRAAGDAPVLLGHSSGALLAHELAF  
RLERAHGAPPAGIVLVDPPYPPGHQEP I EVWSRQLGEGLFAGELEPMSDARLLAMGRYARFLAGPRPGRSSAPVLLV  
RASEPLGDWQEERGDWRAHWDLPH TVADVPGDHFTMMRDHAPAVAEAVLSWLD AIEGIEGAGKLEHHHHHHHHHH

**1<sup>st</sup> polypeptide of traditional 2-polypeptide Pik167, on pTM7**

MAHHHHHHVGTSSAGITRTGARTPVTGRGAAAWDTGEVVRRLPPAGPDHAEHSFSRAPTDGVDRAELIRGEMSTV  
SKSESEEFVSVSNDAGSAHGTAEPVAVVGI SCRVPGARDPREFWELLAAGGQAVTDVPADRWNAGDFYDPPRSAPG  
RSNSRWGGFIEDVDRFDAFFGISPREAAEMDPQORLALELGWEALERAGIDPSSLTGTRTGVFAGAIWDDYATLK  
HRQGGAAITPHTVTGLHRGIIANRLSYTLGLRGPMSVVDSGQSSSLVAVHLACESLRRGESESELALAGGVSLNLVDP  
SIIIGASKFGGLSPDGRAYTFDARANGYVRGEGGGFVVLKRLSRAVADGDPVLAVIRGSVAVNNGGAAQGMTPDAQA  
QEAVLREAHERAGTAPADVRYVELHGTGTPVGDPIEAAALGAALGTGRPAGQPLLVGSVKTNIGHLEGAAGIAGLI  
KAVLAVRGRALPASLNYETPNPAIPFEELNLRVNT EYLPWEPEHDGQRMVVGVS SFGMGGTNAHVVLEEAPGVVEG  
ASVVESTVGGSAVGGGVVWVVSAKSAAALDAQIERLAAFASRDRTDGDVAGAVDAGAVDAGAVARVLAGGRAQFE  
HRAVVVSGSPDDLAALAAPEGLVRGVASGVGRVAFVFPQGQTQWAGMGAELLDSSAVFAAAMAEECEAALS PYVDW  
SLEAVVRQAPGAPTLERVDVVQPVTFAVMVSLARVWQHGGVTPQAVVGHSSQGEIAAAVYVAGALSLDDAARVVTLRS  
KSIAAHLAGKGGMLSLALSEDAVLERLAGFDGLSVAAVNGPTATVVSGDPVQIEELARACEADGVRARVIVPDYAS  
HSRQVEII ESELAEVLAGLSPQAPRVFFFSTLEGAWITEPVLDDGGYWRNLRHRVGFAPAVETLATDEGFTHFVEV  
SAHPVLTMALPGTVTGLATLRDNGGQDRLVASLAEAWANGLAVDWSPLLPSATGHHSDLPTYAFQTERHWLGEIE  
ALAPAGEPAVQPAELDRDEQLRVILDKVRAQTAQVVLGYATGGQIEVDRTFREAGCTSLTGVDLRNR  
INAAFVVRMAPSMIFDFPTPEALAEQLLLHVHGEAAANPAGAEPAPVAAAGAVDEPVAIVGMACRLPGGVASPEDL  
WQLVAGDGDASEFPQDRGWDVEGLYDPPDASGRTYCRSGGFLHDAGEFDADFFGISPREALAMPQQRSLTTA  
WEAIESAGIDPTALKGSGLVFVGGWHTGYTSGQTTAVQSPLEGLHLSGAALGFLSGRIAYVLGTDGPALTVDTA  
CSSSLVALHLAVQALRKGECDMALAGGVTMPNADLFVQFSRQRGLAADGRSKAFATSADGFGPAEGAGVLLVERL  
SDARRNGHRILAVVRGSAVNQDGASNGLTAPHGPSQQRVIRRALADARLAPGDVDVVEAHGTGTRLGDP IEAQALI  
ATYQEKSSSEQPLRLGALKSNIGHTQAAAGVAGVIKMQAMRHGLLPKTLHVDEPSDQIDWSAGTVELLTEAVDWP  
EKQDGGLLRRAAVSSFGISGTNAHVVLEEAPAVEDSPAVEPPAGGGVVPVPSAKTPAALDAQIGQLAAYADGRTDV  
DPAVAARALVDSRTAMEHRAVAVGDSREALRDALRMPEGLVRGTSSDVGRVAFVFPQGQTQWAGMGAELLDSSPEF  
AASMAECETALSRYVDWSLEAVVRQEPGAPTLDRVDVVQPVTFAVMVSLAKVWQHGGITPQAVVGHSSQGEIAAAVY  
AGALTLDDAARVVTLRSKSIAAHLAGKGGMISLALDEAAVLKRLSDFDGLSVAAVNGPTATVVSGDPTQIEELART  
CEADGVRARIIVPDYASHSRQVEIIEKELAEVLAGLAPQAPHVFFFSTLEGTWITEPVLDDGTYWRNLRHRVGFAP  
AVETLAVDGFTHFIEVSHPVLTMTLPETVTGLGTLRREQGGQERLVTSLAEAWANGLTIDWAPILPTATGHHPEL  
PTYAFQTERFWLQSSAPTSAAADDWRVYRVEWKPLTASGQADLSGRWIVAVGSEPEAELLGALKAAGAEVDVLEAGAD  
DDREALAARLTALTGDTGFTGVVSLDDLVQPVAWVQALGDAGIKAPLWSVTQGAVSVGRLDTPADPDRAMLWGLG  
RVVALEHPERWAGLVDLPAQPDAALAHLVLTALSGATGEDQIAIRTTGLHARRLARAPLHGRPRTRDWPHTVLI  
TGGTGALGSHAARWMAHGAEHLVLSRSGEQAPGATQLTAELTASGARVTIAACDVADPHAMRTLLDAI PAETPL  
TAVVHTAGAPGGDPLDVTGPEDIARILGAKTSGAEVLDDLLRGTPLDAFVLYSSNAGVWGSQGVYAAANAH LDA  
LAARRRARGETATSVAVGLWAGDGMGRGADDAYWQRRGIRPMS PDRALDELAKALSHDETFVAVADVDERFAPAF  
TVSRPSSLLLDGVPEARQALAAPVGAPAPGDAAVAPTQSSALAAITALPEPERRPALLTLVRTHAAAVLGHSSPDR  
VAPGRAFTELGFDSLTAVQLRNQLSTVVGNRLPATTVFDHPTPAALAAHLHEAYLAPAEPAPTDWEGRVRRALAE L  
PLDRLRDAGVLDTVLRLTGIEPEPGSGSDGGAADPGAPEPEASIDDLDAEALIRMALGPRNT

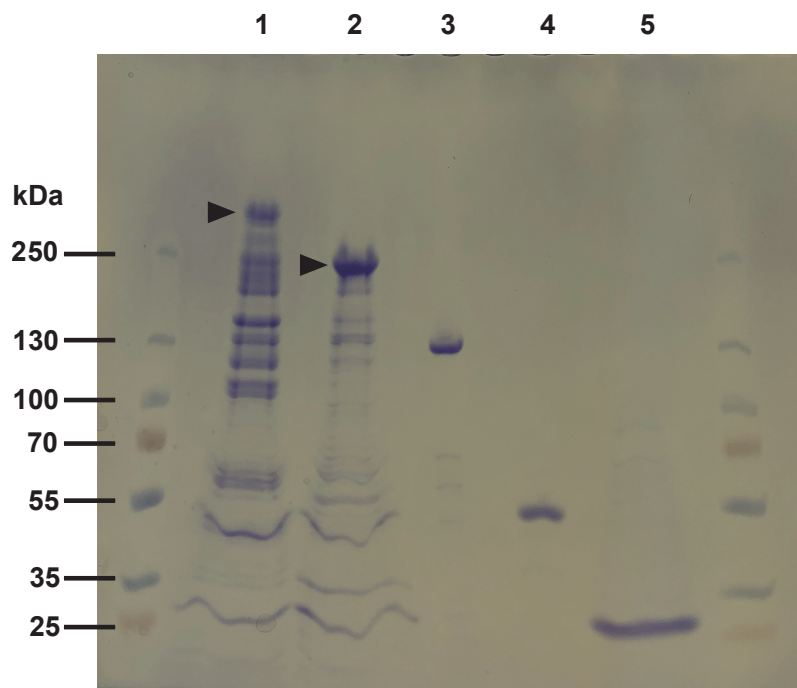

**Figure S1.** SDS-PAGE gel of nickel-NTA purified PKS polypeptides, MatB, and GDH. 4-20% Tris-glycine gel (Thermo Fisher Scientific)

Lane 1: updated 1-polypeptide Pik127, 412 kDa

Lane 2: 1<sup>st</sup> polypeptide of updated Pik167, 275 kDa

Lane 3: 2<sup>nd</sup> polypeptide of updated Pik167, 143 kDa

Lane 4 - MatB, 53 kDa

Lane 5 - GDH, 30 kDa.

First and last lanes: PageRuler Plus Prestained Protein Ladder

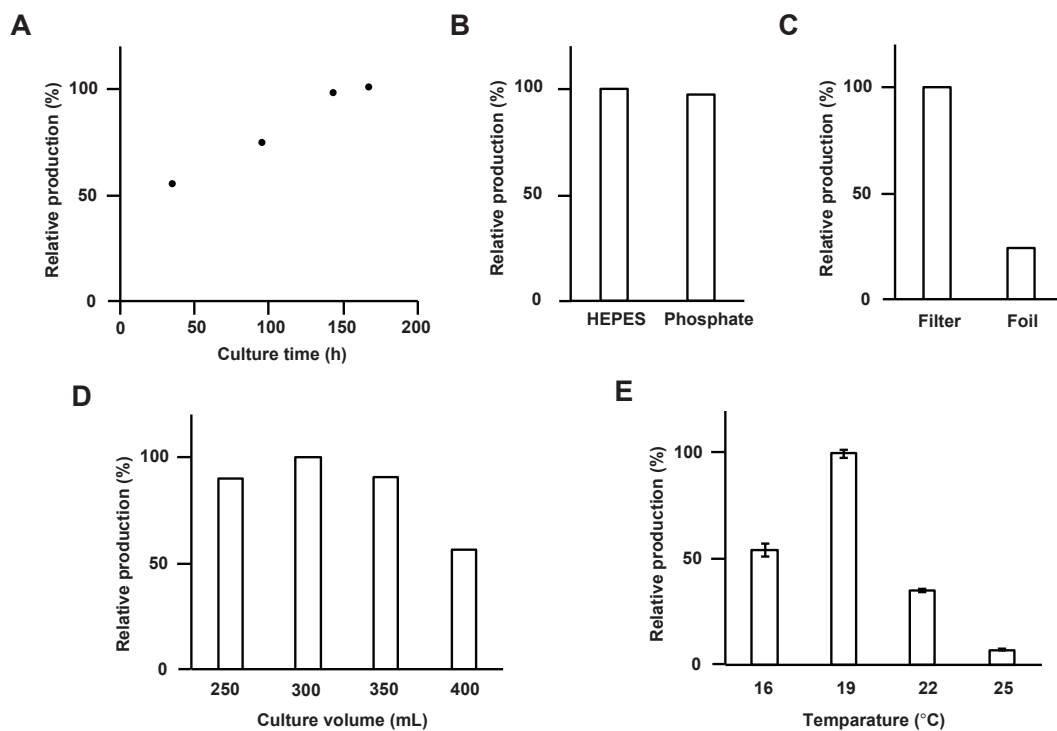

**Figure S2.** Optimization of *in vivo* triketide production. The optimization was performed by monitoring triketide production of **2** by Pik167 using peak areas from HPLC chromatograms ( $\lambda=247$  nm). a) Time course of polyketide production, b) Comparison of HEPES and potassium phosphate buffers, c) Comparison of milk filter disk (Ken AG) and aluminum foil used to cover culture flasks, d) Comparison of culture volumes in a 2.8-L, non-baffled Fernbach flask, e) Comparison of growth temperatures after IPTG induction.



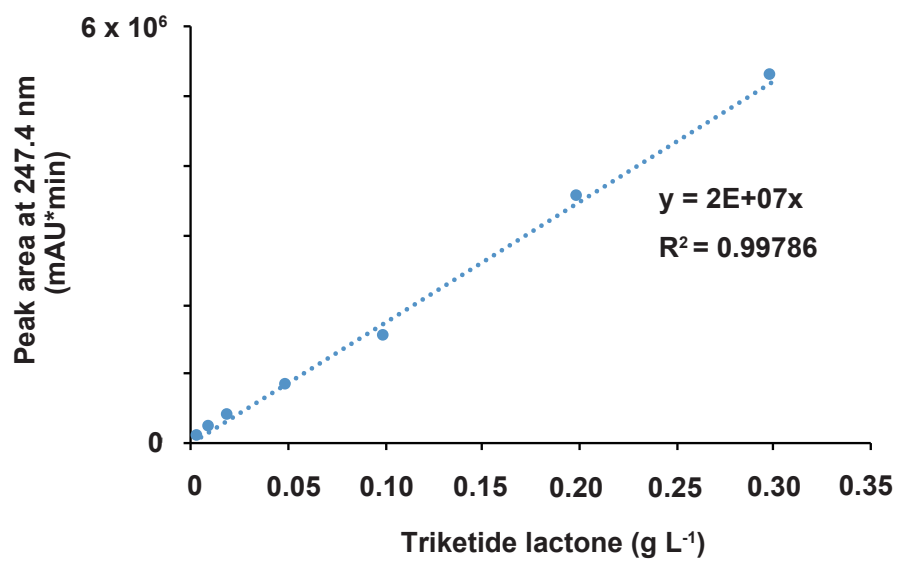

**Figure S3.** Triketide lactone calibration curve. Several concentrations of **1** dissolved in water (10  $\mu$ L) were analyzed by HPLC (conditions in Methods section).

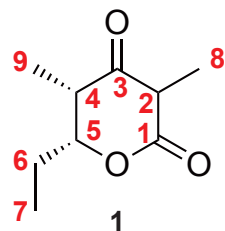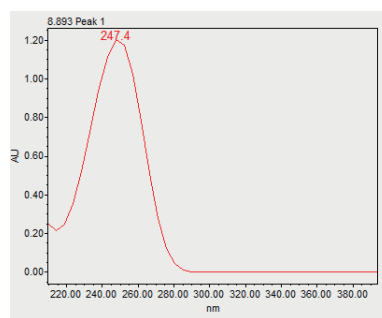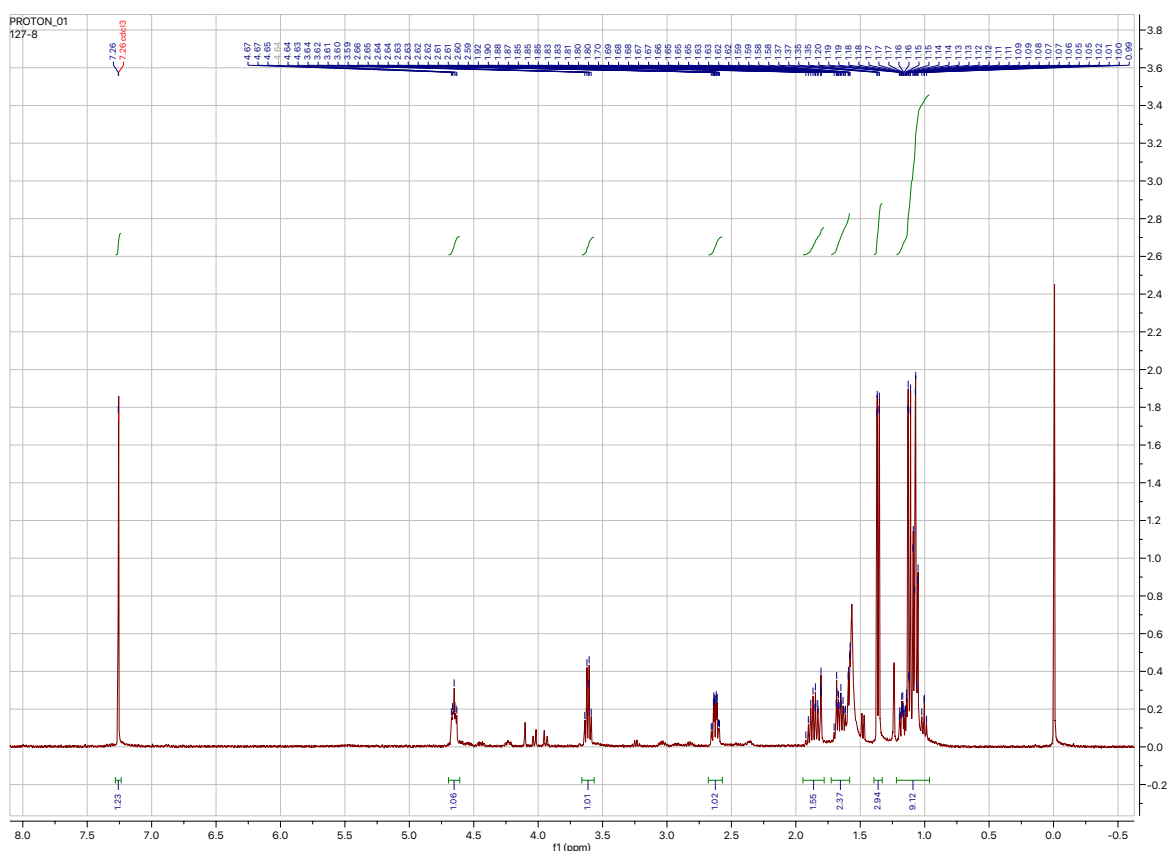

**Figure S4.** <sup>1</sup>H NMR of **1** in CDCl<sub>3</sub>.

<sup>1</sup>H NMR (400 MHz, CDCl<sub>3</sub>)  $\delta$  = 4.65 (m, 1H), 3.61 (q,  $J$ =7 Hz, 1H), 2.62 (dq,  $J$ =7 Hz,  $J$ =3.2 Hz, 1H), 1.85 (m, 1H), 1.65 (m, 1H), 1.36 (d,  $J$ =7 Hz, 3H), 1.12 (d,  $J$ =7 Hz, 3H), 1.07 (t,  $J$ =7 Hz, 3H) (only signals from keto form reported, although signals from enol form are present). HRMS: calcd. for C<sub>9</sub>H<sub>14</sub>O<sub>3</sub> [M+Na]<sup>+</sup>,  $m/z$  193.0835; found,  $m/z$  193.0842.  $\lambda_{\max}$  = 247.4 nm. All characterization matched that from **1** in a previous study.<sup>6</sup>

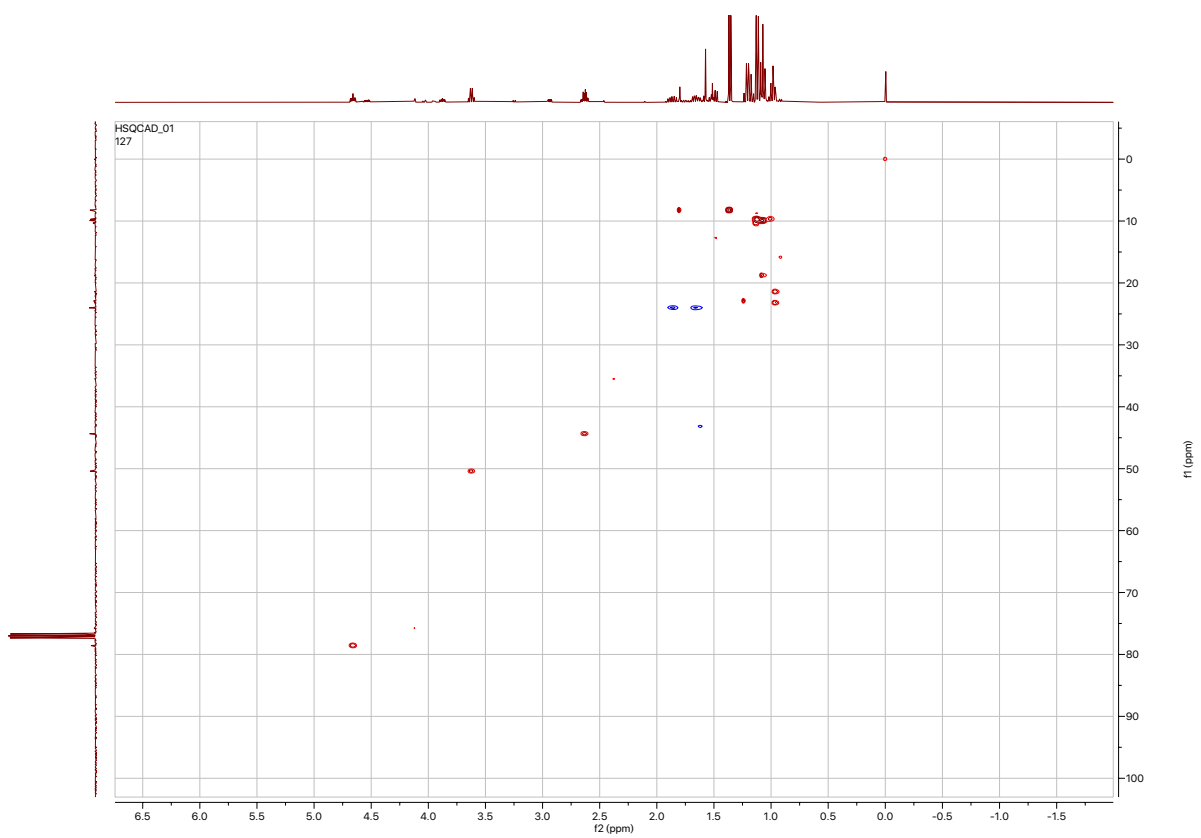

**Figure S5.**  $^1\text{H}$ - $^{13}\text{C}$ -HSQC of **1** in  $\text{CDCl}_3$ .

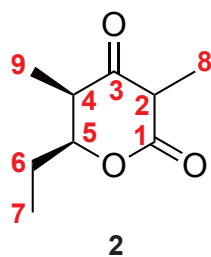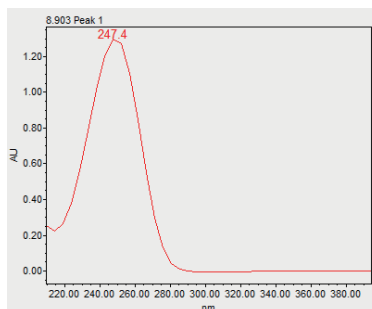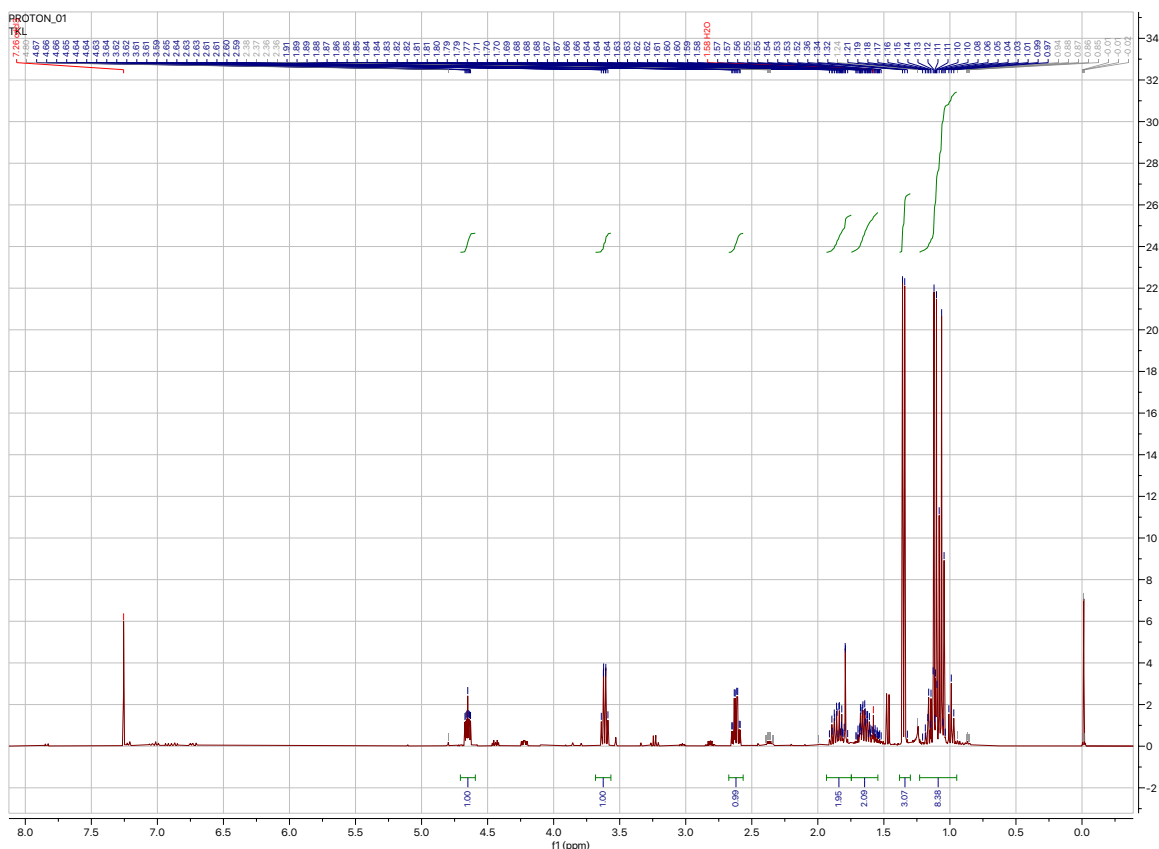

**Figure S6.**  $^1\text{H}$  NMR of **2** in  $\text{CDCl}_3$ .

$^1\text{H}$  NMR (400 MHz,  $\text{CDCl}_3$ )  $\delta$  = 4.67 (m, 1H), 3.61 (q,  $J$ =7 Hz, 1H), 2.62 (dq,  $J$ =7 Hz,  $J$ =3.2 Hz, 1H), 1.85 (m, 1H), 1.65 (m, 1H), 1.36 (d,  $J$ =7 Hz, 3H), 1.12 (d,  $J$ =7 Hz, 3H), 1.07 (t,  $J$ =7 Hz, 3H) (only signals from keto form reported, although signals from enol form are present). HRMS: calcd. for  $\text{C}_9\text{H}_{14}\text{O}_3$   $[\text{M}+\text{Na}]^+$ ,  $m/z$  193.0835; found,  $m/z$  193.0840.  $\lambda_{\text{max}}$  = 247.4 nm. All characterization (except for chiral chromatography and crystallography) matched that of **1** from a previous study.<sup>6</sup>

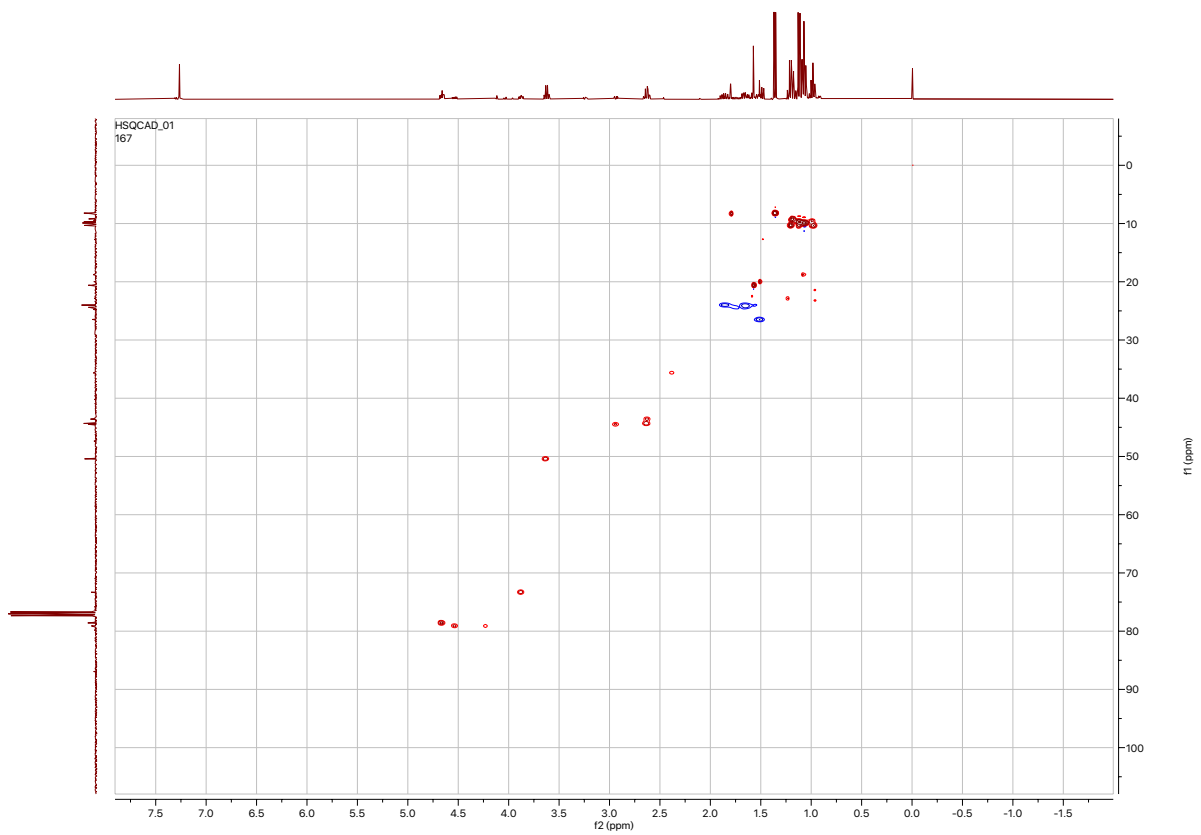

**Figure S7.**  $^1\text{H}$ - $^{13}\text{C}$ -HSQC of **2** in  $\text{CDCl}_3$ .

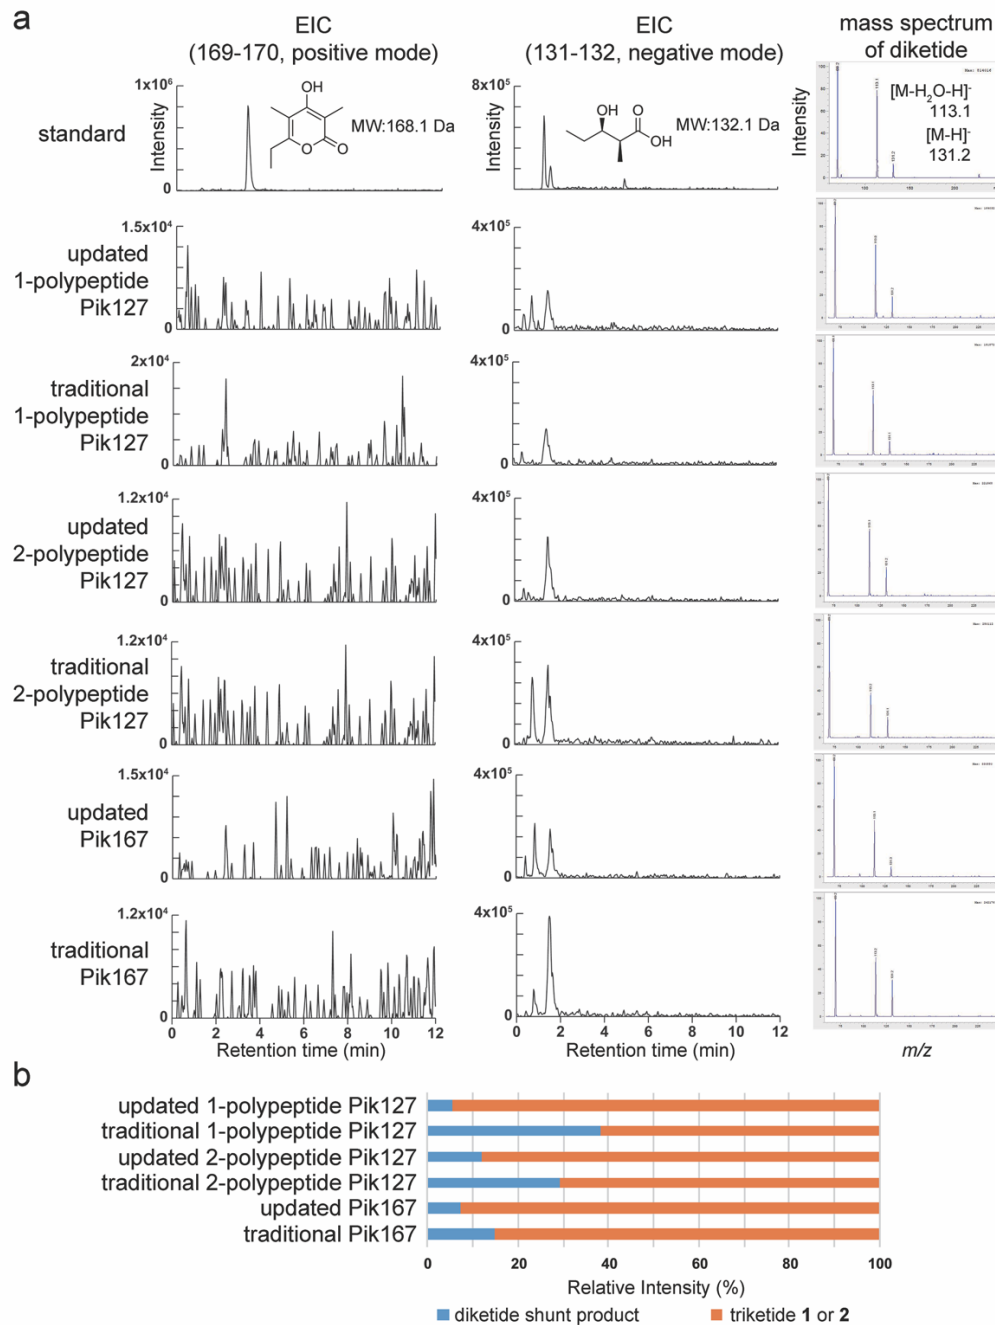

**Figure S8.** Analysis of shunt products. Ethyl acetate extracts from culture broths were analyzed by LC/MS. [Agilent 6120 system equipped with a ZORBAX Eclipse Plus C<sub>18</sub> (2.1 × 50 mm) with a flow rate of 0.8 mL min<sup>-1</sup> (solvent A, water with 0.1% formic acid; solvent B, acetonitrile with 0.1% formic acid. 5-100% B for 12 min)]. The pyrone standard is from an *in vitro* reaction of updated Pik167 without the NADPH regeneration system. The diketide standard, β-D-hydroxy-α-L-methylpentanoic acid, came from a previous study<sup>4</sup>. a) No pyrone was detected from any synthase (left). Diketide products [likely β-D-hydroxy-α-L-methylpentanoic acid for Pik127 synthases and β-L-hydroxy-α-D-methylpentanoic acid for Pik167 synthases] were observed from each synthase (mass spectra of the 1.3 min peak shown for each synthase). b) A comparison of the peak areas from the EIC of the diketide shunt product and the EIC of the triketide product shows that synthases designed with the updated module boundary form a smaller proportion of diketide shunt products.

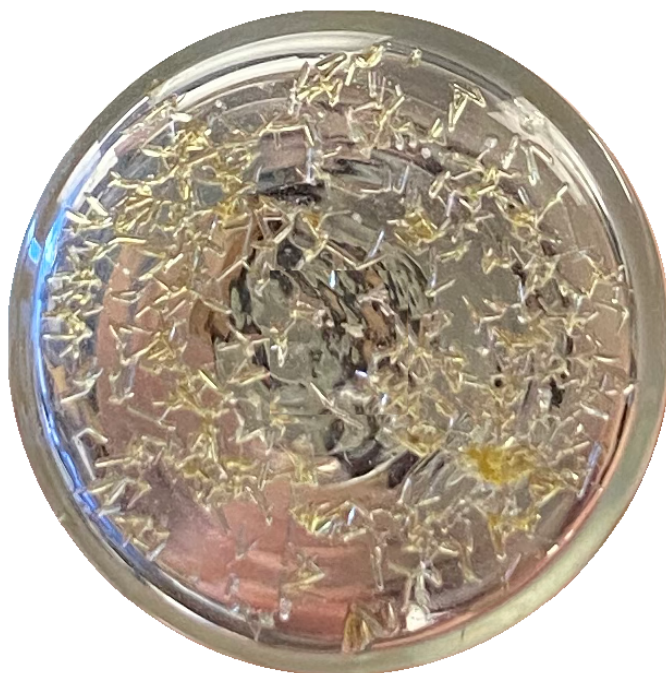

**Figure S9.** Triketide lactone crystals. After silica gel chromatography, a fraction containing **1** was crystallized in a glass vial.

## REFERENCES

1. K. Motohashi, *Methods Mol Biol*, 2017, **1498**, 349-357.
2. T. Miyazawa, M. Hirsch, Z. Zhang and A. T. Keatinge-Clay, *Nat Commun*, 2020, **11**, 80.
3. A. J. Hughes and A. Keatinge-Clay, *Chem Biol*, 2011, **18**, 165-176.
4. S. K. Piasecki, C. A. Taylor, J. F. Detelich, J. N. Liu, J. T. Zheng, A. Komsoukaniants, D. R. Siegel and A. T. Keatinge-Clay, *Chemistry & Biology*, 2011, **18**, 1331-1340.
5. S. Murli, J. Kennedy, L. C. Dayem, J. R. Carney and J. T. Kealey, *J Ind Microbiol Biotechnol*, 2003, **30**, 500-509.
6. A. D. Harper, C. B. Bailey, A. D. Edwards, J. F. Detelich and A. T. Keatinge-Clay, *Chembiochem*, 2012, **13**, 2200-2203.
